## **Distinct effects of host and neighbour tree identity on arbuscular and ectomycorrhizal fungi along a tree diversity gradient**

Running title: Effects of host and neighbour tree on mycorrhiza

Olga Ferlian<sup>1,2§\*</sup>, Kezia Goldmann<sup>3§</sup>, Nico Eisenhauer<sup>1,2</sup>, Mika T. Tarkka<sup>3,1</sup>, François Buscot<sup>3,1</sup>, Anna Heintz-Buschart<sup>1,3</sup>

<sup>1</sup>German Centre for Integrative Biodiversity Research (iDiv) Halle-Jena-Leipzig, Puschstrasse 4, 04103 Leipzig, Germany

<sup>2</sup>Institute of Biology, Leipzig University, Puschstrasse 4, 04103 Leipzig, Germany

<sup>3</sup>UFZ – Helmholtz Centre for Environmental Research, Department Soil Ecology, Theodor-Lieser-Straße 4, 06120 Halle (Saale), Germany

\* These authors contributed equally to this work

§ Correspondence: [olga.ferlian@idiv.de](mailto:olga.ferlian@idiv.de); phone: +49 341 9733173, fax: +49 341 31133134

### **Conflict of Interest**

The authors declare that they have no known conflict of Interest that could have appeared to influence the work reported in this paper.

## **Abstract**

Plant diversity and plant-related ecosystem functions have been in focus in biodiversity-ecosystem functioning studies. However, in this context, biotic interactions with mycorrhizal fungi have been understudied although they are crucial for plant-resource acquisition. We investigated the effects of tree species richness, tree mycorrhizal type on arbuscular (AMF) and ectomycorrhizal fungal (EMF) communities. We aimed to understand how dissimilarities in taxa composition and beta-diversity are related to target trees and neighbours of the same/different mycorrhizal type. We sampled a tree experiment with saplings (~7 years old), where tree species richness (monocultures, 2-species, and 4-species mixtures) and mycorrhizal type were manipulated. AMF and EMF richness significantly increased with increasing tree species richness. AMF richness of mixture plots resembled that of the sum of the respective monocultures, whereas EMF richness of mixture plots was lower compared to the sum of the respective monocultures. Specialisation scores revealed significantly more specialised AMF than EMF suggesting that, in contrast to previous studies, AMF were more specialised, whereas EMF were not. We further found that AMF communities were little driven by the surrounding trees, whereas EMF communities were. Our study revealed the drivers of mycorrhizal fungal communities and further highlights the distinct strategies of AMF and EMF.

## **Keywords**

Biotic interactions, Host preference, Host specificity, Generalists, Illumina sequencing, Mutualism, Mycorrhiza, MyDiv, Specialisation, Tree diversity experiment

## 1 **Introduction**

2 Ecological research in the last decades has provided compelling evidence that biodiversity  
3 change alters ecosystem functioning [1, 2]. This relationship has been studied extensively in  
4 experiments and in natural ecosystems [2, 3]. Typically, plant diversity as well as plant-  
5 related ecosystem functions have predominantly been in the focus [4, 5], while cascading  
6 effects of biodiversity change at one trophic level to other trophic levels have attracted less  
7 attention [6, 7]. However, in this context, biotic interactions with plant symbionts, such as  
8 mycorrhizal fungi, remain unstudied, although they may be directly linked to plant-resource  
9 acquisition and, consequently, to plant competition and coexistence in plant communities [8–  
10 10]. Moreover, there is still a lack of knowledge of the factors that, besides plant diversity  
11 itself, influence plant-symbiont interactions and the impact of different forms of interactions  
12 on each other. One reason could be the still difficult assessment of plant symbionts that are  
13 often of microscopic size [11]. But due to the development of molecular tools [12], the access  
14 to soil-borne organisms has become easier.

15 The majority of plants are associated with a form of mycorrhiza, a close mutualistic  
16 interaction between roots and fungal partners [13]. The two partners are in cellular contact  
17 for nutrient exchange: the fungal partner receives photosynthetically fixed carbon, whereas  
18 the plant partner is supplied with nutrients, such as phosphorus and nitrogen [14].  
19 Furthermore, the ability to tolerate abiotic and biotic environmental stresses increases in  
20 mycorrhizal plants [15, 16]. Mycorrhizal fungi are able to form large hyphal networks  
21 belowground that interconnect multiple host plants [17]. Such common mycorrhizal networks  
22 further contribute to the enhanced nutrient supply by gathering and sharing distant resources  
23 that are otherwise inaccessible to plant roots [13].

24 The two main groups of mycorrhizal symbioses on trees of temperate zones are arbuscular  
25 mycorrhiza (AM) and ectomycorrhiza (EM), which have distinct life strategies with respect to  
26 resource acquisition and allocation as well as interaction strength [13, 18, 19]. AMF can

27 primarily access mineral nutrients, and only a few taxa are able to acquire P and N from  
28 organic sources [20, 21]. EMF have the ability to decompose dead organic matter [14, 22].  
29 The general assumption that plants associate exclusively with one mycorrhizal type has  
30 been repealed by repeatedly detecting dual mycorrhization with AMF and EMF in plant roots  
31 [23, 24]. The extent of this dualism is often context-related and depends on environmental  
32 factors, such as nutrient availability, climatic conditions, or plant age [23]. A general  
33 prerequisite for the colonisation by specific fungal species as well as their diversity is the  
34 propagule reservoir in soil. Nevertheless, one of the two mycorrhizal types dominates the  
35 association with a plant host [25] with differential benefits from AMF and EMF colonisation,  
36 but there is limited information on the local drivers of dual mycorrhization and mycorrhizal  
37 diversity.

38 Higher plant diversity and, thus, more variance in root traits and microenvironments leads to  
39 a higher diversity of mycorrhizal fungi in experimental set-ups, where the diversity of plant  
40 communities was manipulated [8, 26, 27]. However, we lack knowledge on species  
41 composition of mycorrhizal fungi in diverse plant communities compared to those in their  
42 respective plant monocultures, i.e., whether compositions are additive or potentially follow  
43 other patterns, and on the respective underlying mechanisms. Furthermore, the  
44 characteristics of the associating fungal species, such as their specificity, may be of  
45 importance. Some mycorrhizal fungal species are shared by different plant species, whereas  
46 others are specialised on particular plants. Typically, AMF include more generalists that  
47 colonise several plant species than EMF [28, 29]. Also, AM and EM plants can have certain  
48 levels of specificity for particular mycorrhizal fungi and their specific characteristics [30, 31].  
49 But to date, only few studies have been carried out in forest systems to explore tree  
50 neighbourhood effects on mycorrhizal diversity and community composition [32].

51 In our study, we took advantage of an existing diversity experiment with tree saplings (6.5 to  
52 7.5 years old), where tree species richness (monocultures, 2-species, and 4-species

53 mixtures) and root mycorrhization were manipulated via suitable tree species selection [33].  
54 Tree communities of only AM, only EM, and of trees with both mycorrhizal types were set up.  
55 Our study represents a follow-up study to Heklau et al. [24] who analysed the effects of  
56 differently mycorrhized tree neighbours on target trees' fungal community compositions at an  
57 earlier time point. We further studied the effects of tree species richness, tree mycorrhizal  
58 type, neighbourhood, and their interactions on AMF and EMF specialisation, community  
59 richness, phylogenetic diversity, and beta-diversity. We hypothesized that (1) AMF richness  
60 of all tree species in tree species mixtures is lower than the sum of the respective number of  
61 AMF species of the tree species in monocultures and that EMF display the opposite pattern.  
62 Hypothesised mechanisms are the comparably specialist strategy of EMF, the generalistic  
63 strategy of AMF, as well as the selection for generalistic AMF being increasingly shared by  
64 tree species in mixtures. We further hypothesised that (2) AM trees have a higher AMF  
65 richness and EM trees have a higher EMF richness, and, thus, the former comprises a  
66 higher proportion of specialised AMF and the latter a higher proportion of specialised EMF.  
67 (3) Due to the dominance of generalistic species in AMF, mycorrhizal associations are  
68 expected to be driven by tree species identity and/or mycorrhizal type of the tree neighbour  
69 in the case of AMF but not of EMF. Thus, AMF composition is hypothesised to be more  
70 similar among neighbouring tree species than EMF composition.

71

## 72 **Results**

### 73 *Sequencing success and mycorrhizal fungal richness*

74 All roots were checked for mycorrhization, and the colonisation rates were microscopically  
75 determined for AMF and EMF (Supplementary Table S1). AM colonisation rates were higher  
76 in AM trees (1.58 - 25.81%) than in EM trees (0.85 - 2.06%). EM colonisation rates were

77 higher in EM trees (59.49 - 88.33%) than in AM trees (0.00 - 1.07%), where they were equal  
78 to zero in four of the five tree species.

79 The sequencing and the subsequent bioinformatic analyses led to 62 AMF VT in 179 root  
80 samples, and 174 EMF ASVs in 152 root samples.

81 Overall, the mean AMF richness per plot was slightly higher than the one for EMF  
82 (Supplementary Table S2). However, the fungal richness varied according to the tree  
83 mycorrhizal type of the trees, i.e. there were more AMF VT associated with roots of AM trees  
84 and more EMF ASVs in EM roots. Furthermore, plots with only AM trees had a higher AMF  
85 richness compared to plots with only EM trees. Plots with both mycorrhizal types had an  
86 intermediate AMF richness. For both AMF and EMF, fungal richness increased significantly  
87 from tree monocultures to mixtures (ANOVA,  $P < 0.05$ ).

88

#### 89 *Expected vs. observed fungal richness*

90 The correlation between observed (number of unique fungal species detected in all trees of a  
91 mixture plot) and expected (number of unique fungal species in the respective monocultures  
92 of the tree species in mixture plots) AMF richness was positive in all treatments, except for  
93 EM plots with four species (Fig. 1a). However, only the correlations of AMF richness in AM  
94 plots with two tree species and those in plots with both mycorrhizal types with two tree  
95 species were significant (Table 1). Regression models of four-species mixtures had generally  
96 lower slopes and deviated more from the 1:1 line than models of two-species mixtures,  
97 indicating that the observed fungal richness decreased relative to the expected richness with  
98 higher tree species richness.

99 In contrast to the patterns in AMF, all correlations between expected and observed EMF  
100 richness had negative trends (Fig. 1b). However, no single correlation was significant (Table

101 1). Correlations could not be analysed in plots with only AM trees due to the low number of  
102 samples where EMF-ASVs were detected. Moreover, all data points were distributed below  
103 the 1:1 line, indicating lower than expected EMF richness in the mixture plots.

104 Overall, the AMF data points were more evenly distributed around the 1:1 line, and  
105 regression lines were relatively similar to the 1:1 line in terms of slope and position than the  
106 EMF data points. Consequently, divergence between AMF expected and observed fungal  
107 richness was overall lower than that for EMF with lower EMF fungal richness in the mixtures  
108 than expected.

109

#### 110 *Taxonomic overview*

111 The taxonomic assignments gained from the fungal amplicon sequencing were supported by  
112 results retrieved from Sanger sequencing of mycorrhizal structures after the morphotyping  
113 (Supplementary Results S1, Table S3). Although not all fungal ASVs were found with this  
114 traditional sequencing method, we showed that the high-throughput approach covered the  
115 living fungi.

116 The AMF belonged to eight different genera, with a majority belonging to *Glomus* (35 AMF).  
117 Only three AMF appeared in all studied treatments (Fig. 2a). The overall AMF richness  
118 increased with increasing AM tree species richness, but decreased again if there was an EM  
119 tree present (ANOVA,  $P < 0.05$ ; Fig. 2a). EM trees also had AMF. In fact, even there, the  
120 AMF richness increased from EM tree monocultures to mixtures (ANOVA,  $P < 0.05$ ; Fig. 2a).  
121 However, the highest richness coupled with the biggest variety of AMF genera in EM tree  
122 treatments was found in four species mixtures, where EM and AM trees occurred together  
123 (Fig. 2a). Only three AMF taxa were found in all treatments (Fig. 2a). In contrast, the EMF  
124 belonged to 16 different genera (seven Ascomycota and nine Basidiomycota genera) and no  
125 EMF appeared in all treatments (Fig. 2b). The overall richness of Ascomycota was higher in

126 AM tree treatments and Basidiomycota predominated when an EM tree species was also  
127 present (ANOVA,  $P < 0.05$ ; Fig. 2b). The overall EMF richness was considerably lower in AM  
128 trees, but a general increase of EMF richness with increasing AM tree diversity level was  
129 detectable (ANOVA,  $P < 0.05$ ; Fig. 2b). Likewise, the overall EMF richness linearly increased  
130 with increasing diversity of EM trees and, again, decreased in the treatments where AM and  
131 EM trees were mixed (Fig. 2b). Generally, we found a higher proportion of AMF taxa shared  
132 by multiple experimental treatments compared to EMF taxa, and the shared AMF taxa were  
133 also present in larger sets of treatments in AMF compared to EMF.

134

### 135 *Specialisation of fungi*

136 We calculated a score to evaluate the specialisation of mycorrhizal fungi along the gradient  
137 of tree species richness (Fig. 3). This revealed a constant, high specialisation of AMF to AM  
138 and EM trees in tree monocultures and mixtures, with the exception of the treatments with  
139 only EM trees (ANOVA,  $P < 0.05$ ). Likewise, the EMF specialisation was high in all  
140 treatments except the ones containing only AM trees (ANOVA,  $P < 0.05$ ).

141 The degree of average specialisation was higher in AMF than EMF (Wilcoxon rank sum test  
142 with continuity correction,  $P < 0.001$ ). Thereby, the AMF and EMF found in tree species  
143 mixtures appeared to be rather associated to AM and EM trees, respectively. This means  
144 that trees on plots with both mycorrhizal types have EM tree-specific EMF and only very  
145 limited AM tree-specific EMF and *vice versa*.

146 This analysis also allowed the identification of specific AMF or EMF taxa that were highly  
147 specialized to trees of either mycorrhizal type (Supplementary Table S4). The findings  
148 revealed that genera like *Glomus* and *Paraglomus*, which include the majority of AMF,  
149 showed high specialisation. Among those, the number of specialised AMF on AM trees was



150 higher than on EM trees. Similarly, more EMF were specialised on EM trees than on AM  
151 trees.

152

### 153 *Tree host species and neighbour effects on phylogenetic diversity*

154 AMF phylogenetic diversity in AM trees was significantly affected by tree species identity of  
155 the target tree and, in EM trees, by mycorrhizal type of the tree neighbours (Table 2). AMF  
156 phylogenetic diversity in EM trees was significantly higher when the tree neighbour was of  
157 the other mycorrhizal type compared to a neighbour of the same type (Fig. 4a). EMF  
158 phylogenetic diversity in AM and EM trees was significantly affected by mycorrhizal type of  
159 the tree neighbours and, in EM trees, further by tree species identity of the target tree (Table  
160 2). EMF phylogenetic diversity in AM trees was significantly higher when the tree neighbour  
161 was of the other mycorrhizal type compared to a neighbour of the same type (Fig. 4b). In  
162 contrast, in EM trees, EMF phylogenetic diversity was significantly lower when the tree  
163 neighbour was of the other mycorrhizal type compared to a neighbour of the same type. AMF  
164 and EMF phylogenetic diversities did not differ between the other treatments.

165

### 166 *Similarities of mycorrhizal fungal communities among tree species and communities*

167 To understand if the fungal communities associated with trees in mixtures are more similar to  
168 the respective monoculture communities or to the communities of the tree neighbours, we  
169 analysed the pairwise Soerensen similarities of the mycorrhizal fungal communities (Fig. 5).  
170 AMF communities in mixtures were more similar to monocultures of the same tree species  
171 than to their neighbours within mixtures, indicating tree species-specific communities (Fig.  
172 5a, b). In comparison, EMF communities of target trees were more similar to those of tree  
173 neighbours than between the target tree in monocultures and mixtures indicating mixture-

174 adapted communities (Fig. 5c, d). This pattern was stable when comparing monocultures to  
175 two or monocultures to four tree-species mixtures.

176

177

## 178 **Discussion**

179 Overall, our study showed that AM colonisation rates were relatively low in AM trees and  
180 even lower in EM trees; EM colonisation rates were higher in EM trees than in AM trees.  
181 With increasing tree species richness, AMF as well as EMF richness increased. Surprisingly,  
182 AMF richness of mixture plots resembled that of the sum of the respective monocultures,  
183 whereas EMF richness of mixture plots was lower compared to the sum of the respective  
184 monocultures. Zooming into this pattern, we found that tree species in mixtures more  
185 commonly shared EMF than AMF, suggesting that EMF tended to be more generalistic than  
186 AMF in our study. This was supported by the finding that EMF diversity and composition of  
187 target trees were more strongly influenced by the mycorrhizal identity of the tree neighbour in  
188 comparison to AMF.

189

### 190 *Fungal richness in AM vs. EM trees*

191 We found expected differences in the mycorrhizal community compositions between AM and  
192 EM host trees with more AMF than EMF on AM trees and more EMF than AMF on EM trees.  
193 Morphologically assessed mycorrhizal colonisation rates of AM and EM supported these  
194 findings. This is in line with findings in Heklau et al. [24], where root mycorrhizal communities  
195 were characterised using morphological and next-generation sequencing techniques in the  
196 same experiment two years prior to our assessments. Interestingly, both studies showed that  
197 all tree species had a dual mycorrhization with AM and EM trees being more equally

198 colonised by AMF than by EMF. This suggests that the two tree species groups (AM and EM  
199 trees) rather form two distant tree species pools along a continuum of AMF-to-EMF  
200 colonisation instead of two distinct characteristics.

201 Interestingly, typical forest EMF taxa, such as *Russula* or *Inocybe* [34], were not found on  
202 our sampled trees which, in contrast, were rich in members of Pezizales that have been  
203 associated with young seedlings during early phases of forestation [35, 36]. Possible  
204 reasons could be that the site used to be an agricultural field without any forest stands in the  
205 surroundings before setting up the plots [37]. Accordingly, the reservoir for EMF propagules  
206 can be estimated as poor, most likely with only a small potential for pioneer EMF at the  
207 beginning of the experiment [38]. Moreover, even after the trees were planted, the coverage  
208 with the weed tarp to minimise weed interference could have led to a decreased amount of  
209 propagules entering the soil and tree roots via wind or animal dispersal. In addition, the form  
210 and extent of mycorrhizal associations are typically context-dependent, e.g., dependent on  
211 abiotic factors, such as nutrient availability [23, 39]. The specific nutrient- and humus-rich  
212 Chernozem soil of the MyDiv experimental site could have restricted common EMF infections  
213 that typically supply the plant host with nutrients from the decomposition of dead organic  
214 matter.

215 Overall, among the AMF, we predominantly found members of the Glomerales, such as  
216 *Glomus*, that are characterised as r-strategists, i.e. with a short generation time, fast growing  
217 hyphae, and low resource use efficiency [40, 41]. Their ability to adapt and reproduce quickly  
218 may have led to this *Glomus* dominance that in turn may have facilitated the dominance of  
219 rather generalistic AMF, and they have been reported to occur in high abundances in forests  
220 before by Öpik et al. [42]. The dominance by *Glomus* could lead to an outcompeting of other  
221 AMF and, accordingly, cause a decrease of AMF richness [43]. However, we did not observe  
222 a decrease in AMF richness, but rather a high species diversity within the genus *Glomus*.  
223 Besides, the *Glomus* dominance may partially be due to an over-representation of  
224 sequences affiliated to this genus by the amplification of the SSU marker region [41].

225 Our results further showed that both AMF and EMF richness of the target tree were positively  
226 related to tree species richness of the plot, which is in line with previous studies [44, 45]. The  
227 observations support the idea of a sampling effect, meaning that in more diverse plant  
228 communities, the probability of having species with distinct abilities to associate with  
229 particular fungal species increases [46]. Higher plant diversity also facilitates diverse  
230 microenvironments and divergent niches for soil microorganisms in general [8, 26, 27]. In  
231 addition, higher plant diversity is well-known to increase plant biomass and, consequently,  
232 the extent and diversity of carbon inputs into the rhizosphere [47] facilitating the coexistence  
233 of a multitude of fungal species [48]. However, the majority of previous studies exploring the  
234 plant diversity–fungal diversity relationship assessed fungal communities in soil (plot level)  
235 rather than in host tree individuals, although the latter is more indicative of the actual  
236 interactions between fungi and plants [26, 46] (but see [8, 44]). Saks et al. [49] found that  
237 AMF community composition in soil was rather random and influenced by environmental  
238 factors compared to AMF in roots, where also comparably more species were found. Given  
239 the fact that these relationships hold true for communities in both soil and tree roots, we can  
240 presume that one important factor limiting root colonisation of particular fungal species is its  
241 availability in soil.

242

### 243 *Specialisation in mycorrhizal fungi*

244 Overall, AMF richness of all tree species (in all treatments) in mixtures resembled that of the  
245 sum of their respective monocultures. In contrast, EMF richness of all tree species in  
246 mixtures tended to be generally lower than the sum of their respective monocultures. This  
247 suggests that the AMF assemblages in mixtures were composed of distinct unique fungal  
248 species that specifically associate with particular tree species, irrespective of the surrounding  
249 plant community composition. In contrast, the sum of unique EMF increased comparably little  
250 from monocultures (expected) to mixtures (observed), indicating that tree species in mixtures

251 share part of the EMF species. These findings are exactly opposite to what we hypothesised.  
252 Interestingly, in four-species mixtures, we found a slight but consistent weaker relationship  
253 between expected and observed richness compared to two-species mixtures, both for AMF  
254 and EMF. This shows that with increasing tree diversity (from two to four), mycorrhizal fungal  
255 species associated with respective tree species increasingly overlap among the tree species.  
256 Tree species mixtures, in contrast to monocultures, contain more potential host plants and  
257 create a relatively heterogeneous soil environment in terms of resources, which may  
258 consequently, favour generalistic over specialised fungal species [8], explaining the  
259 increasing proportion of generalistic fungi with increasing plant diversity.

260 Calculations of specialisation coefficients revealed that AM and EM trees associated  
261 preferably with specialised AMF and EMF, respectively, which confirmed our second  
262 hypothesis. The results suggest that the mycorrhizal fungi belonging to the opposite  
263 mycorrhizal type than the host tree are comparably rare and rather generalistic taxa. This  
264 was further supported by the finding that, in AM trees, the species identity of the target tree  
265 only drove the phylogenetic diversity of the fungal community belonging to the same  
266 mycorrhizal type. This may partly be due to the marginal EM colonisation of AM trees. Molina  
267 and Horton [50] reviewed plant host preferences of AMF and EMF and argued that hosts  
268 may preferably allocate resources to specialised rather than generalistic fungi, as they  
269 benefit more from interactions with specialist fungi. Within the two major EMF phyla,  
270 Ascomycota were more dominant than Basidiomycota on AM trees in AM treatments,  
271 whereas Basidiomycota predominated on AM trees when EM trees were present, which  
272 suggests different specificities of the EMF of the two phyla. In AM trees, for example, there  
273 were far more AMF than EMF which points to a particular selectivity that may lead to a high  
274 proportion of specialised AMF in AM trees compared to EM trees.

275 In general, we found more specialised AMF than EMF confirming the idea of a more  
276 specialised strategy in AMF and a more generalistic strategy in EMF (EMF sharing [39]),

277 which may also mechanistically explain the observed patterns of the relationships between  
278 expected and observed fungal species richness. van der Linde [51] also reported that only  
279 approximately 10% of EMF are host-specific. However, this is in contrast to our main  
280 hypothesis that is based on the theory of the fungi's evolutionary history and previous  
281 findings, where AMF are commonly assumed to be generalists, whereas EMF are host-  
282 specific [49, 52]. Generalistic AMF were also confirmed by Weißbecker et al. [8], who used  
283 the same measure of species specialisation, but analysed soil from the root zone.  
284 Specialisation estimates mostly originate from lab studies or specific contexts. Most  
285 cultivable AMF species used in lab experiments are generalists [50]. Contexts, such as  
286 ecosystem (e.g., grasslands/agricultural sites vs. forests), biome (e.g., (sub)tropical vs.  
287 temperate), and host type (e.g., gymno- vs. angiosperms) may drive the distribution of AM  
288 and EM [53], and it, thus, seems likely that they drive their specificity. In any case, it has to  
289 be noted that in both, AMF and EMF, specialised and generalistic species exist [50].

290 Specialisation scores further revealed that adding tree species of a different mycorrhizal type  
291 to a plant community resulted in an increase of specialised mycorrhizal fungi in the target  
292 tree when the added tree was of the same mycorrhizal type as the fungal type in question.  
293 Some mycorrhizal fungi seemed to depend on tree communities, where AM and EM trees  
294 grew together, which may point to a facilitation by neighbouring trees or the existence of  
295 mycorrhizal fungal species that form common mycorrhizal networks among trees of different  
296 mycorrhizal types [50, 54]. As most mycorrhizal trees were found to have dual  
297 mycorrhization, it is not surprising that AM and EM trees may also interconnect. In our study,  
298 this effect could be detected for AMF as well for EMF. Such potential transfer of resources  
299 may considerably complement other acquisition strategies of trees and contribute to an  
300 increase in ecosystem functioning in communities with trees of different dominant  
301 mycorrhizal types [33].

302

303 *Effects of tree neighbour identity*

304 Our results indicated that fungal diversity was driven by tree species identity of the target  
305 tree and the mycorrhizal type of the tree neighbour. Surprisingly, tree species identity of the  
306 neighbour or tree species richness of the community did not significantly affect fungal  
307 diversity. These results applied to both AMF and EMF but were found to be more  
308 pronounced in EMF, which refutes our third hypothesis assuming that exclusively AMF  
309 communities are affected by the identity of the tree neighbour. This suggests that beyond the  
310 local availability of infective propagules, such as spores and hyphae, in soil [49], two  
311 important factors determining mycorrhizal associations (host plant and biotic environment  
312 [55]) are underpinned by distinct mechanisms. This is valid for different mycorrhizal types.  
313 Associations with trees depended on host species identity; however, the effect of the  
314 neighbouring tree community was rather driven by their mycorrhizal identity. This is in line  
315 with several previous studies (e.g., Dickie et al. [56]), but contrasts more recent findings that  
316 fungal specificity on host plants, especially in AMF, is targeted at a broader unit, such as the  
317 ecological-group level of the plant species [42, 57].

318 We found that fungal AMF diversity on EM trees was increased by the presence of AM tree  
319 neighbours, and EMF diversity on AM trees was increased by the presence of EM tree  
320 neighbours but not that of the other fungal group, respectively. Although all tree species have  
321 a dual mycorrhization with both mycorrhizal types [23], the mycorrhizal fungi species within  
322 each fungal group seem to be distinct between AM and EM trees. This may be an effect of  
323 the opposing dominance of the mycorrhizal types in AM and EM trees. Such specific tree  
324 neighbours may facilitate mycorrhizal associations of a target tree. A neighbour effect was  
325 suggested, where the litter produced by tree neighbours may trigger specific fungal  
326 communities that colonise the target tree [50]. This hypothesis may have limited relevance in  
327 our study, as all of our plots were covered with tarp that prevented leaf litter material, the  
328 dominant form of litter in our system, from entering the soil. Moreover, the mycorrhizal

329 identity of the tree neighbour may (more than tree species) influence the nutrient availability  
330 for the target tree directly or indirectly via altering soil microbial communities and, thus, its  
331 associations with fungal partners it exchanges resources with (Singavarapu et al. under  
332 review). Another potential interaction between target and neighbour trees are common  
333 mycorrhizal networks that need a specific tree partner of AMF and EMF [23].

334 For EMF diversity, we further found that EM trees were not only unaffected by the presence  
335 of AM tree neighbours on the plots, but EMF diversity even decreased, which may point to a  
336 dilution effect, as stated in Heklau et al. [24]. It describes that the presence of an  
337 unfavourable tree in the surrounding (in our case a tree of the other mycorrhizal type) may  
338 dilute potential interaction partners and, thus, limit the mycorrhizal association of the target  
339 tree.

340 Using the Soerensen similarity index, we also found that AMF communities of a specific tree  
341 species were more similar between respective individuals in monocultures vs. mixtures than  
342 between individuals of different tree species within a plot indicating a species-specific  
343 community (in both 2-species and 4-species mixtures). EMF communities showed the  
344 opposite pattern indicating a mixture-adapted community. This further supports our findings  
345 stated above that AMF communities were poorly predicted by the neighbouring plant  
346 community and, thus, comparably specialised, whereas EMF communities were comparably  
347 generalistic.

348

### 349 *Conclusions*

350 Our study identified factors influencing the diversity of AMF and EMF communities  
351 associated with deciduous tree roots in a temperate forest plantation. Hereby, tree diversity,  
352 host species identity, and the mycorrhizal type of the surrounding plant community played  
353 significant roles. Building on the results found in Heklau et al. [24], we were able to further



354 identify factors predicting mycorrhizal fungal communities and explaining the lack of additive  
355 effects of fungal species from tree monocultures to mixtures. We found substantial  
356 differences in the specificity of AMF and EMF. In contrast to our expectations and previous  
357 studies, AMF showed a more specialised and EMF a more generalistic strategy. The  
358 unexpected result highlights the fact that few studies have explored fungal communities of  
359 both AMF and EMF in parallel in temperate deciduous tree species. Furthermore, our study  
360 sheds light on the dual mycorrhization of trees which has been documented repeatedly but  
361 not explored in terms of the ecological specifics of the fungal partners that were considerably  
362 different between AM and EM trees. Finally, the type of the surrounding plant community  
363 played a more important role for EMF than for AMF, pointing to the importance of thorough  
364 plant species selection in forestry, e.g., for the set-up of productive tree plantations. Such  
365 insights help understanding the role of plant symbionts in plant interactions and competition,  
366 and, consequently, in the general mechanisms underlying biodiversity-ecosystem functioning  
367 relationships.

368

## 369 **Material and Methods**

### 370 *Study site*

371 The study was carried out as part of the MyDiv Experiment, a tree diversity experiment  
372 located in Saxony-Anhalt, Germany, at the Bad Lauchstädt Experimental Research Station  
373 of the Helmholtz Centre for Environmental Research – UFZ (51°23' N, 11°53' E [33]). The  
374 elevation is 115 m a.s.l.; the continental climate has an annual mean temperature of 8.8°C  
375 and a mean annual precipitation of 484 mm; the parent material is silt over calcareous silt;  
376 the soil type is Haplic Chernozem developed from Loess with a pH ranging between 6.6 and  
377 7.4 [33, 58]. For more detailed site characteristics, see Ferlian et al. [33].

378 The MyDiv site encompasses 80 11×11 m plots that were set up in March 2015, with a core  
379 area in the centre of each plot (8×8 m). Each plot contains 140 trees in a 1 m-planting  
380 distance. All plots were covered by a water-permeable weed tarp to minimise weed  
381 interference. A total of ten tree species, five AM and five EM trees, were either planted in  
382 replicated monocultures, two-species or four-species mixtures [33]. Moreover, the design  
383 implemented a mycorrhizal type treatment represented by communities with only AM trees,  
384 only EM trees, or a combination of AM and EM trees in mixtures [33]. There was no direct  
385 control of mycorrhizal fungal association; and the treatment was established through  
386 assignment of tree species to dominant mycorrhizal types based on literature review (e.g.,  
387 Wang and Qiu [59]) and respective planting. The following deciduous tree species were  
388 selected for the AM tree species pool: *Acer pseudoplatanus*, *Aesculus hippocastanum*,  
389 *Fraxinus excelsior*, *Prunus avium*, and *Sorbus aucuparia*; and the EM tree species pool:  
390 *Betula pendula*, *Carpinus betulus*, *Fagus sylvatica*, *Quercus petraea*, and *Tilia platyphyllos*.  
391 Per tree species, two monocultures were established. Furthermore, ten replicates per  
392 species richness level and mycorrhizal type were established, distributed over two blocks.

393

#### 394 *Root sampling*

395 Extending the sampling design of Heklau et al. [24], 200 root samples, one per plot and tree  
396 species, were taken in November 2019. In total, root samples from all 20 monocultures, 30  
397 two-species mixtures, and 30 four-species mixtures were taken, ensuring that the correct  
398 individuals were sampled and avoiding contaminations (see Supplementary Methods S1).

399

#### 400 *Quantification of mycorrhizal colonisation*

401 AM colonisation of roots was quantified following Vierheilig et al. [60] by bleaching the roots  
402 in 10% KOH at 60°C overnight and staining the roots in a solution of 10% ink, 10%  
403 concentrated acetic acid, and 80% water. AM colonisation was quantified by assessing the  
404 abundances of arbuscules, vesicles, and hyphae with the gridline-intersect method [61]. The  
405 degree of EM colonisation was determined from fresh roots under a dissecting microscope  
406 accounting for differences in fine root morphology, colour, thickness, texture, and branching  
407 patterns of rootlets. From each sample, ten ~5 cm root pieces of the first order were  
408 identified as colonised with EM when having a lighter colour and swollen tips, otherwise they  
409 were counted as inactive or not colonised. For analysis, frequency of EMF in percent was  
410 calculated as the proportion of root tips with active mycorrhiza in relation to all root tips  
411 examined.

412

#### 413 *Identification of colonising mycorrhizal fungi via Sanger sequencing*

414 For identification of root-inhabiting fungi, rootlets with ten EM root tips of EM trees or ten  
415 lateral roots of AM were harvested (from the samples for quantification of mycorrhizal  
416 colonisation) to polyethylene glycol 200 (Sigma-Aldrich, St. Louis, USA) adjusted to pH 13.  
417 The roots were extracted mechanically with glass beads by vortexing to release their DNA  
418 into the liquid. ITS regions were amplified according to White et al. [62] with the primers ITS1  
419 (10  $\mu$ M – 5'-TCCGTAGGTGAACCTGCGG) and ITS4 (10  $\mu$ M – 5'-  
420 TCCTCCGCTTATTGATATGC), and Promega Green (Promega, Madison, USA) and  
421 sequenced with the ITS1 primer using Big Dye Termination Mix (GeneCust Europe,  
422 Dudelange, Luxembourg). Sequence quality was manually controlled using Sequencher  
423 5.4.5. Sequences were compared to the UNITE database 8.0 using BLASTN 2.8.1. The raw  
424 Sanger sequences were deposited in the National Center for Biotechnology Information  
425 (NCBI) Genbank database under the accession numbers MW695221-MW695361.

426

427 *DNA extraction and Illumina sequencing*

428 The root samples were first chopped and then manually ground using a porcelain mortar and  
429 liquid nitrogen. Approximately 0.2 g of the pulverised material was used for DNA-extraction  
430 using the Quick-DNA™ Fecal/Soil Microbe Miniprep Kit (Zymo Research Europe, Freiburg,  
431 Germany) following the manufacturer's recommendations. Fungal ITS2 regions were  
432 amplified following the descriptions in Prada-Salcedo et al. [10] and AMF SSU regions were  
433 amplified following a nested PCR approach [63] (see Supplementary Methods S2). Libraries  
434 were prepared using Illumina Nextera XT and used for paired-end sequencing of 2x300 bp  
435 with a MiSeq Reagent kit v3 on an Illumina MiSeq platform. The raw Illumina sequences  
436 were deposited in the SRA of NCBI under the BioProject accession number PRJNA706719.

437

438 *Bioinformatics*

439 Sequencing reads were processed to amplicon sequence variants (ASVs) using the DADA2  
440 [64] based pipeline dada2, version 0.4 [65] (for settings, see Supplementary Methods  
441 S3). The consensus sequence of each SSU-ASV was aligned by BLASTn against the online  
442 database MaarjAM (accessed on 05-18-2020; [66]). SSU-ASVs with an assignment to the  
443 same virtual taxon (VT) were merged by summing up the respective read counts. All  
444 sequences of SSU-ASVs without a VT assignment were used to construct a maximum  
445 likelihood phylogenetic tree using MAFFT [67] and raxML [68]. Accordingly, SSU-ASVs in  
446 monophyletic clusters with more than 97% sequence identity were merged. The merged VTs  
447 were named in accordance with the names used in MaarjAM [66]. Clustered ASVs were  
448 named "add\_cluster1+n" and sorted according to sequence abundance. In contrast, the  
449 taxonomic assignment for the ITS2 sequences was performed using the mothur  
450 implementation of the Bayesian classifier [69] and the database UNITE, version 8.2, [70]

451 within dadasnake [65]. The tool FUNGuild, version 1.0, was used to parse fungal taxonomy  
452 and determine ecological guilds [71]. All unambiguous assignments with a confidence of  
453 “possible”, “probable”, and “highly probable” were considered. All ITS2-ASVs with an EMF-  
454 classification were considered for subsequent analyses.

455

#### 456 *Statistical analysis*

457 We calculated observed total AMF VT and EMF ASV richness per mixture plot by summing  
458 the unique fungal species of all tree species within a plot (same fungal species in several  
459 tree species were counted as one fungal species). We, further, calculated expected total  
460 AMF and EMF richness per mixture plot by summing up the richness of unique fungal  
461 species of the respective monocultures. Correlations between expected and observed fungal  
462 richness were tested per tree species richness level and mycorrhizal type using a linear  
463 model. The 1:1 line in the plots indicates equal expected and observed fungal richness. The  
464 observed AMF VT and EMF ASV richness, and the taxa shared between plot types were  
465 visualised using upsetR [72]. The  $\phi$  (phi) specialization coefficient was calculated to  
466 determine the specialisation of each AMF VT and EMF ASV to each treatment, respectively  
467 (tree species richness x mycorrhizal type; see Supplementary Methods S4) [73]. To avoid  
468 biases due to generally rare taxa, the specialisation score of each taxon was  
469 standardised to the phi coefficients of 100 respective null models, derived by randomly  
470 swapping the mycorrhizal type of all samples. The threshold for significant specialisation  
471 was defined as 3 standard deviations from the mean of the null models.

472 We used linear mixed effects models to test the effects of tree species richness of the plot,  
473 tree species identity of the tree neighbour, mycorrhizal type of the target tree, and  
474 mycorrhizal type of the tree neighbour on fungal phylogenetic diversity of the target tree. We  
475 used random intercept models with plot nested in block as random factors.

476 To assess beta-diversity between treatments, we compared the pairwise Soerensen  
477 similarities of focal trees by extracting each pair of trees in mixed stands with its respective  
478 monoculture individual in the same block from the beta-diversity matrix (60 focal AM-tree  
479 monoculture pairs and 76 focal EM-tree monoculture pairs). In addition, all pairwise  
480 Soerensen similarities between target and neighbouring trees (35 AM-tree neighbour pairs  
481 and 39 EM-tree neighbour pairs) were extracted. The sets of similarities from each diversity  
482 level and mycorrhizal type treatment (AM-2 species, AM-4 species, EM-2 species, EM-4  
483 species) were compared separately using Wilcoxon's rank sum test.

484

#### 485 Acknowledgements

486 We thank the numerous helpers who supported us in the field. We thank Beatrix Schnabel,  
487 Melanie Günther, and Cynthia Albracht (UFZ) for technical assistance in sample processing  
488 and Illumina sequencing, Anja Zeuner and Romy Zeiss (iDiv) for technical assistance in  
489 determining mycorrhization rates and Kerstin Hommel (UFZ) for Sanger sequencing. The  
490 fungal composition data were computed at the High-Performance Computing (HPC) Cluster  
491 EVE, a joint effort of both the Helmholtz Centre for Environmental Research - UFZ and the  
492 German Centre for Integrative Biodiversity Research (iDiv) Halle-Jena-Leipzig, whose  
493 administrators are thanked for excellent support. This work was supported by the European  
494 Research Council (ERC) under the European Union's Horizon 2020 research and innovation  
495 program (grant agreement no. 677232). AHB was funded by and further support came from  
496 the German Centre for Integrative Biodiversity Research (iDiv) Halle-Jena-Leipzig, funded by  
497 the German Research Foundation (FZT 118, 202548816).

498

#### 499 **References**

- 500 1. Loreau M, Naeem S, Inchausti P, et al (2001) Biodiversity and ecosystem functioning:  
501 Current knowledge and future challenges. *Science* 294:804–808
- 502 2. Cardinale BJ, Duffy JE, Gonzalez A, et al (2012) Biodiversity loss and its impact on  
503 humanity. *Nature* 486:59–67
- 504 3. Jochum M, Fischer M, Isbell F, et al (2020) The results of biodiversity-ecosystem  
505 functioning experiments are realistic. *Nat Ecol Evol* 4:1485–1494
- 506 4. Balvanera P, Pfisterer AB, Buchmann N, He J-S, Nakashizuka T, Raffaelli D, Schmid  
507 B (2006) Quantifying the evidence for biodiversity effects on ecosystem functioning  
508 and services. *Ecol Lett* 9:1146–1156
- 509 5. Cardinale BJ, Matulich KL, Hooper DU, Byrnes JE, Duffy E, Gamfeldt L, Balvanera P,  
510 O'Connor MI, Gonzalez A (2011) The functional role of producer diversity in  
511 ecosystems. *Am J Bot* 98:572–592
- 512 6. Haddad NM, Crutsinger GM, Gross K, Haarstad J, Knops JMH, Tilman D (2009) Plant  
513 species loss decreases arthropod diversity and shifts trophic structure. *Ecol Lett*  
514 12:1029–1039
- 515 7. Scherber C, Eisenhauer N, Weisser WW, et al (2010) Bottom-up effects of plant  
516 diversity on multitrophic interactions in a biodiversity experiment. *Nature* 468:553–556
- 517 8. Weißbecker C, Heintz-Buschart A, Bruehlheide H, Buscot F, Wubet T (2019) Linking  
518 soil fungal generality to tree richness in young subtropical Chinese forests.  
519 *Microorganisms* 7:547
- 520 9. Prada-Salcedo LD, Wambsganss J, Bauhus J, Buscot F, Goldmann K (2020) Low root  
521 functional dispersion enhances functionality of plant growth by influencing bacterial  
522 activities in European forest soils. *Env Microbiol* 23:1889-1906
- 523 10. Prada-Salcedo LD, Goldmann K, Heintz-Buschart A, Reitz T, Wambsganss J, Bauhus  
524 J, Buscot F (2021) Fungal guilds and soil functionality respond to tree community  
525 traits rather than to tree diversity in European forests. *Mol Ecol* 30:572–591

- 526 11. Baldrian P (2019) The known and the unknown in soil microbial ecology. *FEMS*  
527 *Microbiol Ecol* 95:fiz005
- 528 12. van Dijk EL, Auger H, Jaszczyszyn Y, Thermes C (2014) Ten years of next-generation  
529 sequencing technology. *Trends Genet* 30:418–426
- 530 13. Smith SE, Read DJ (2010) *Mycorrhizal symbiosis*. Academic press
- 531 14. Chen W, Koide RT, Eissenstat DM, Field K (2018) Nutrient foraging by mycorrhizas:  
532 From species functional traits to ecosystem processes. *Funct Ecol* 32:858–869
- 533 15. Bahadur A, Batool A, Nasir F, Jiang S, Mingsen Q, Zhang Q, Pan J, Liu Y, Feng H  
534 (2019) Mechanistic insights into arbuscular mycorrhizal fungi-mediated drought stress  
535 tolerance in plants. *Int J Mol Sci* 20:4199
- 536 16. Pena R, Polle A (2014) Attributing functions to ectomycorrhizal fungal identities in  
537 assemblages for nitrogen acquisition under stress. *ISME J* 8:321–330
- 538 17. He X-H, Critchley C, Bledsoe C (2003) Nitrogen Transfer Within and Between Plants  
539 Through Common Mycorrhizal Networks (CMNs). *CRC Crit Rev Plant Sci* 22:531–567
- 540 18. Aerts R (2003) The role of various types of mycorrhizal fungi in nutrient cycling and  
541 plant competition. In: *Mycorrhizal Ecol*. Springer, pp 117–133
- 542 19. Phillips RP, Brzostek E, Midgley MG (2013) The mycorrhizal-associated nutrient  
543 economy: A new framework for predicting carbon-nutrient couplings in temperate  
544 forests. *New Phytol* 199:41–51
- 545 20. Hodge A, Campbell CD, Fitter AH (2001) An arbuscular mycorrhizal fungus  
546 accelerates decomposition and acquires nitrogen directly from organic material.  
547 *Nature* 413:297
- 548 21. Koide RT, Kabir Z (2000) Extraradical hyphae of the mycorrhizal fungus *Glomus*  
549 intraradices can hydrolyse organic phosphate. *New Phytol* 148:511–517
- 550 22. Martin F, Kohler A, Murat C, Veneault-Fourrey C, Hibbett DS (2016) Unearthing the



- 551 roots of ectomycorrhizal symbioses. *Nat Rev Microbiol* 14:760–773
- 552 23. Teste FP, Jones MD, Dickie IA (2020) Dual-mycorrhizal plants: their ecology and  
553 relevance. *New Phytol* 225:1835–1851
- 554 24. Heklau H, Schindler N, Buscot F, Eisenhauer N, Ferlian O, Prada Salcedo LD,  
555 Bruelheide H (2021) Mixing tree species associated with arbuscular or ectotrophic  
556 mycorrhizae reveals dual mycorrhization and interactive effects on the fungal partners.  
557 *Ecol. Evol.* <https://doi.org/10.1002/ece3.7437>
- 558 25. Regvar M, Likar M, Piltaver A, Kugonič N, Smith JE (2010) Fungal community  
559 structure under goat willows (*Salix caprea* L.) growing at metal polluted site: the  
560 potential of screening in a model phytostabilisation study. *Plant Soil* 330:345–356
- 561 26. Waldrop MP, Zak DR, Blackwood CB, Curtis CD, Tilman D (2006) Resource  
562 availability controls fungal diversity across a plant diversity gradient. *Ecol Lett* 9:1127–  
563 1135
- 564 27. Hooper DU, Bignell DE, Brown VK, et al (2000) Interactions between Aboveground  
565 and Belowground Biodiversity in Terrestrial Ecosystems: Patterns, Mechanisms, and  
566 Feedbacks: We assess the evidence for correlation between aboveground and  
567 belowground diversity and conclude that a variety of mechanisms co. *Bioscience*  
568 50:1049–1061
- 569 28. Montesinos-Navarro A, Segarra-Moragues JG, Valiente-Banuet A, Verdú M (2012)  
570 The network structure of plant–arbuscular mycorrhizal fungi. *New Phytol* 194:536–547
- 571 29. Bahram M, Harend H, Tedersoo L (2014) Network perspectives of ectomycorrhizal  
572 associations. *Fungal Ecol* 7:70–77
- 573 30. Querejeta J, Egerton-Warburton LM, Allen MF (2009) Topographic position modulates  
574 the mycorrhizal response of oak trees to interannual rainfall variability. *Ecology*  
575 90:649–662
- 576 31. Bergmann J, Weigelt A, van der Plas F, et al (2020) The fungal collaboration gradient

- 577 dominates the root economics space in plants. *Sci Adv* 6:eaba3756
- 578 32. Weißbecker C, Wubet T, Lentendu G, Kühn P, Scholten T, Bruelheide H, Buscot F  
579 (2018) Experimental evidence of functional group-dependent effects of tree diversity  
580 on soil fungi in subtropical forests. *Front Microbiol* 9:2312
- 581 33. Ferlian O, Cesarz S, Craven D, et al (2018) Mycorrhiza in tree diversity–ecosystem  
582 function relationships: conceptual framework and experimental implementation.  
583 *Ecosphere* 9:e02226
- 584 34. Tedersoo L, May TW, Smith ME (2010) Ectomycorrhizal lifestyle in fungi: global  
585 diversity, distribution, and evolution of phylogenetic lineages. *Mycorrhiza* 20:217–263
- 586 35. Kolaříková Z, Kohout P, Krüger C, Janoušková M, Mrnka L, Rydlová J (2017) Root-  
587 associated fungal communities along a primary succession on a mine spoil: Distinct  
588 ecological guilds assemble differently. *Soil Biol Biochem* 113:143–152
- 589 36. Dang P, Vu NH, Shen Z, Liu J, Zhao F, Zhu H, Yu X, Zhao Z (2018) Changes in soil  
590 fungal communities and vegetation following afforestation with *Pinus tabulaeformis* on  
591 the Loess Plateau. *Ecosphere* 9:e02401
- 592 37. Kalucka IL, Jagodzinski AM (2016) Successional traits of ectomycorrhizal fungi in  
593 forest reclamation after surface mining and agricultural disturbances: A review.  
594 *Dendrobiology* 76:
- 595 38. Jones MD, Durall DM, Cairney JWG (2003) Ectomycorrhizal fungal communities in  
596 young forest stands regenerating after clearcut logging. *New Phytol* 157:399–422
- 597 39. Rog I, Rosenstock NP, Korner C, Klein T (2020) Share the wealth: Trees with greater  
598 ectomycorrhizal species overlap share more carbon. *Mol Ecol* 29:2321–2333
- 599 40. Chagnon PL, Bradley RL, Maherali H, Klironomos JN (2013) A trait-based framework  
600 to understand life history of mycorrhizal fungi. *Trends Plant Sci* 18:484–491
- 601 41. Ohsowski BM, Zaitsoff PD, Öpik M, Hart MM (2014) Where the wild things are: looking  
602 for uncultured Glomeromycota. *New Phytol* 204:171–179

- 603 42. Öpik M, Metsis M, Daniell TJ, Zobel M, Moora M (2009) Large-scale parallel  
604 sequencing reveals host ecological group specificity of arbuscular mycorrhizal fungi in  
605 a boreonemoral forest. *New Phytol* 184:424–437
- 606 43. Buscot F (2015) Implication of evolution and diversity in arbuscular and  
607 ectomycorrhizal symbioses. *J Plant Physiol* 172:55–61
- 608 44. Hiiesalu I, Pärtel M, Davison J, Gerhold P, Metsis M, Moora M, Öpik M, Vasar M,  
609 Zobel M, Wilson SD (2014) Species richness of arbuscular mycorrhizal fungi:  
610 associations with grassland plant richness and biomass. *New Phytol* 203:233–244
- 611 45. Nguyen NH, Williams LJ, Vincent JB, Stefanski A, Cavender-Bares J, Messier C,  
612 Paquette A, Gravel D, Reich PB, Kennedy PG (2016) Ectomycorrhizal fungal diversity  
613 and saprotrophic fungal diversity are linked to different tree community attributes in a  
614 field-based tree experiment. *Mol Ecol* 25:4032–4046
- 615 46. Burrows RL, Pflieger FL (2002) Arbuscular mycorrhizal fungi respond to increasing  
616 plant diversity. *Can J Bot* 80:120–130
- 617 47. Eisenhauer N, Lanoue A, Strecker T, Scheu S, Steinauer K, Thakur MP, Mommer L  
618 (2017) Root biomass and exudates link plant diversity with soil bacterial and fungal  
619 biomass. *Sci Rep* 7:44641
- 620 48. Lange M, Eisenhauer N, Sierra CA, et al (2015) Plant diversity increases soil microbial  
621 activity and soil carbon storage. *Nat Commun* 6:1–8
- 622 49. Saks Ü, Davison J, Öpik M, Vasar M, Moora M, Zobel M (2013) Root-colonizing and  
623 soil-borne communities of arbuscular mycorrhizal fungi in a temperate forest  
624 understorey. *Botany* 92:277–285
- 625 50. Molina R, Horton TR (2015) Mycorrhiza Specificity: Its Role in the Development and  
626 Function of Common Mycelial Networks BT - Mycorrhizal Networks. In: Horton TR  
627 (ed). Springer Netherlands, Dordrecht, pp 1–39
- 628 51. van der Linde S, Suz LM, Orme CDL, et al (2018) Environment and host as large-

- 629 scale controls of ectomycorrhizal fungi. *Nature* 558:243–248
- 630 52. Rasmussen AL, Busby RR, Hoeksema JD (2017) Host preference of ectomycorrhizal  
631 fungi in mixed pine–oak woodlands. *Can J For Res* 48:153–159
- 632 53. Soudzilovskaia NA, Vaessen S, van't Zelfde M, Raes N (2017) Global patterns of  
633 mycorrhizal distribution and their environmental drivers. In: *Biogeography of*  
634 *mycorrhizal symbiosis*. Springer, pp 223–235
- 635 54. Simard SW, Jones MD, Durall DM (2003) Carbon and Nutrient Fluxes Within and  
636 Between Mycorrhizal Plants BT - *Mycorrhizal Ecology*. In: van der Heijden MGA,  
637 Sanders IR (eds). Springer Berlin Heidelberg, Berlin, Heidelberg, pp 33–74
- 638 55. Allen EB, Allen MF, Helm DJ, Trappe JM, Molina R, Rincon E (1995) Patterns and  
639 regulation of mycorrhizal plant and fungal diversity. *Plant Soil* 170:47–62
- 640 56. Dickie IA, Koide RT, Fayish AC (2001) Vesicular–arbuscular mycorrhizal infection of  
641 *Quercus rubra* seedlings. *New Phytol* 151:257–264
- 642 57. Davison J, Öpik M, Daniell TJ, Moora M, Zobel M (2011) Arbuscular mycorrhizal  
643 fungal communities in plant roots are not random assemblages. *FEMS Microbiol Ecol*  
644 78:103–115
- 645 58. Altermann M, Rinklebe J, Merbach I, Körschens M, Langer U, Hofmann B (2005)  
646 Chernozem—soil of the year 2005. *J Plant Nutr Soil Sci* 168:725–740
- 647 59. Wang B, Qiu Y-L (2006) Phylogenetic distribution and evolution of mycorrhizas in land  
648 plants. *Mycorrhiza* 16:299–363
- 649 60. Vierheilig H, Schweiger P, Brundrett M (2005) An overview of methods for the  
650 detection and observation of arbuscular mycorrhizal fungi in roots. *Physiol Plant*  
651 125:393–404
- 652 61. Giovannetti M, Mosse B (1980) An evaluation of techniques for measuring vesicular  
653 arbuscular mycorrhizal infection in roots. *New Phytol* 489–500

- 654 62. White TJ, Bruns T, Lee S, Taylor J (1990) Amplification and direct sequencing of  
655 fungal ribosomal RNA genes for phylogenetics. In: PCR Protoc. a Guid. to methods  
656 Appl. San Diego., pp 315–322
- 657 63. Wahdan SFM, Reitz T, Heintz-Buschart A, Schädler M, Roscher C, Breitzkreuz C,  
658 Schnabel B, Purahong W, Buscot F (2021) Organic agricultural practice enhances  
659 arbuscular mycorrhizal symbiosis in correspondence to soil warming and altered  
660 precipitation patterns. Environ Microbiol. [https://doi.org/https://doi.org/10.1111/1462-](https://doi.org/https://doi.org/10.1111/1462-2920.15492)  
661 [2920.15492](https://doi.org/https://doi.org/10.1111/1462-2920.15492)
- 662 64. Callahan BJ, McMurdie PJ, Rosen MJ, Han AW, Johnson AJ, Holmes SP (2016)  
663 DADA2: High-resolution sample inference from Illumina amplicon data. Nat Methods  
664 13:581–583
- 665 65. Weißbecker C, Schnabel B, Heintz-Buschart A (2020) Dadasnake, a Snakemake  
666 implementation of DADA2 to process amplicon sequencing data for microbial ecology.  
667 Gigascience 9:giaa135
- 668 66. Öpik M, Vanatoa A, Vanatoa E, Moora M, Davison J, Kalwij JM, Reier Ü, Zobel M  
669 (2010) The online database MaarjAM reveals global and ecosystemic distribution  
670 patterns in arbuscular mycorrhizal fungi (Glomeromycota). New Phytol 188:223–241
- 671 67. Katoh K, Asimenos G, Toh H (2009) Multiple alignment of DNA sequences with  
672 MAFFT. In: Bioinforma. DNA Seq. Anal. Springer, pp 39–64
- 673 68. Stamatakis A (2006) RAxML-VI-HPC: maximum likelihood-based phylogenetic  
674 analyses with thousands of taxa and mixed models. Bioinformatics 22:2688–2690
- 675 69. Schloss PD, Westcott SL, Ryabin T, et al (2009) Introducing mothur: open-source,  
676 platform-independent, community-supported software for describing and comparing  
677 microbial communities. Appl Environ Microbiol 75:7537–7541
- 678 70. Nilsson RH, Larsson KH, Taylor AFS, et al (2018) The UNITE database for molecular  
679 identification of fungi: handling dark taxa and parallel taxonomic classifications.

680 Nucleic Acids Res 47:D259–D264

681 71. Nguyen NH, Song Z, Bates ST, Branco S, Tedersoo L, Menke J, Schilling JS,  
682 Kennedy PG (2016) FUNGuild: An open annotation tool for parsing fungal community  
683 datasets by ecological guild. Fungal Ecol 20:241–248

684 72. Conway JR, Lex A, Gehlenborg N (2017) UpSetR: an R package for the visualization  
685 of intersecting sets and their properties. Bioinformatics 33:2938–2940

686 73. Chytrý M, Tichý L, Holt J, Botta-Dukát Z (2002) Determination of diagnostic species  
687 with statistical fidelity measures. J Veg Sci 13:79–90

688

689 **Figure captions**

690 Fig. 1 | Correlations between expected and observed unique (a) arbuscular mycorrhizal  
691 fungal and (b) ectomycorrhizal fungal richness in plots with AM, EM, and both mycorrhizal  
692 type trees (AM, EM, and Both), in 2- and 4-species mixtures (-2 and -4). The grey dashed  
693 lines represent the 1:1 line, where expected equals observed fungal richness. Treatments  
694 whose data did not allow for statistical analyses (low detection rates) do not have a  
695 regression line. Asterisks indicate significant correlations (\*\*P < 0.01) (N = 188).

696

697 Fig. 2 | UpSet plots displaying for a) AMF and b) EMF, the richness and composition of the  
698 treatments overall (horizontal bars) and of specific and shared subsets of fungal taxa  
699 (vertical bars) according to the intersection matrix. Connected dots represent intersections of  
700 shared fungal taxa. Horizontal bars of each panel represent the mycorrhizal fungal richness  
701 as absolute count values, colour-coded according to the assigned fungal genera. Vertical  
702 bars show the intersection size between fungal communities in the different treatments.  
703 Numbers above vertical bars represent the number of fungi taxa found in the treatment(s)  
704 marked by the black dot(s) (N = 188).

705

706 Fig. 3 | Specialisation scores of arbuscular mycorrhizal fungi (AMF) virtual taxa and  
707 ectomycorrhizal fungi (EMF) amplicon sequencing variants in trees with predominantly  
708 arbuscular mycorrhiza (AM trees) and trees with predominantly ectomycorrhiza (EM trees)  
709 across all treatments, respectively (mycorrhizal type of tree: AM, EM, and Both; tree species  
710 richness levels: 1, 2 and 4). The score represents the difference between the specialisation  
711 phi of a fungal taxon to its respective tree type and the mean of the specialisation of 100 null  
712 models for this taxon, divided by the standard deviation of the 100 null models for this ASV.  
713 The dashed lines indicate 0 and 3 standard deviations (N = 188).

714

715 Fig. 4 | Fungal phylogenetic diversity of (a) arbuscular mycorrhizal (AMF) and (b)  
716 ectomycorrhizal fungi (EMF) in roots of target trees predominantly forming arbuscular  
717 mycorrhiza (AM trees) and that forming ectomycorrhiza (EM trees) as affected by the  
718 mycorrhizal type of the tree neighbour. Significant differences are indicated by asterisks. \*P  
719 < 0.5, \*\*\*P < 0.001 (N = 188).

720

721 Fig. 5 | Comparisons of pairwise beta-diversities. The left box of each panel represents the  
722 Soerensen similarity between mycorrhizal fungal communities of target tree in mixture and  
723 that of monoculture; the right box represents the Soerensen similarity between mycorrhizal  
724 fungal communities of the target tree and that of their the neighbouring tree; a) AMF  
725 communities of AM trees in two species mixtures (AM-2); b) AMF communities of AM trees in  
726 four species mixtures (AM-4); c) EMF communities of EM trees in two species mixtures (EM-  
727 2); d) EMF communities of EM trees in four species mixtures (EM-4). Letters above boxplots  
728 indicate significant differences according to Wilcoxon rank sum tests, P < 0.05 (N = 188).



(a)

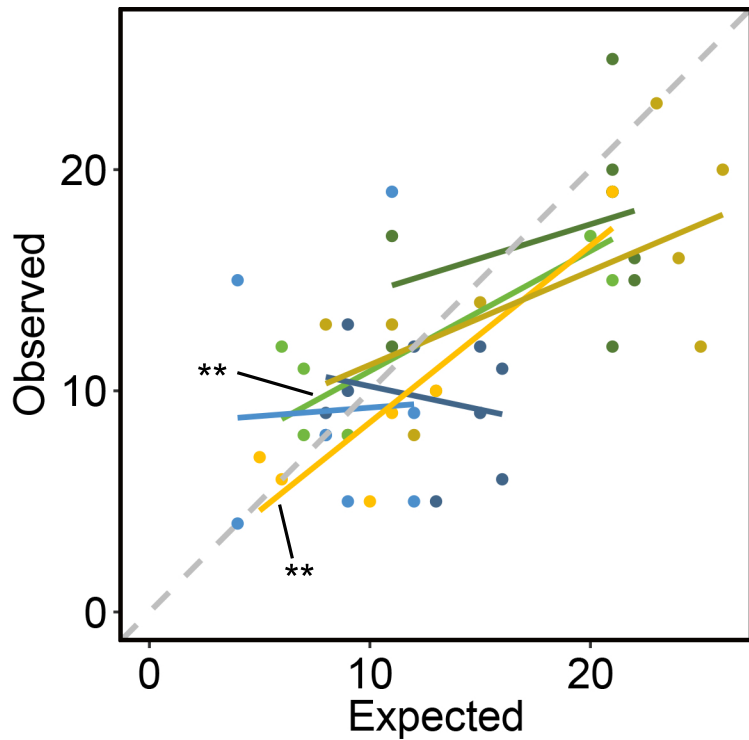

(b)

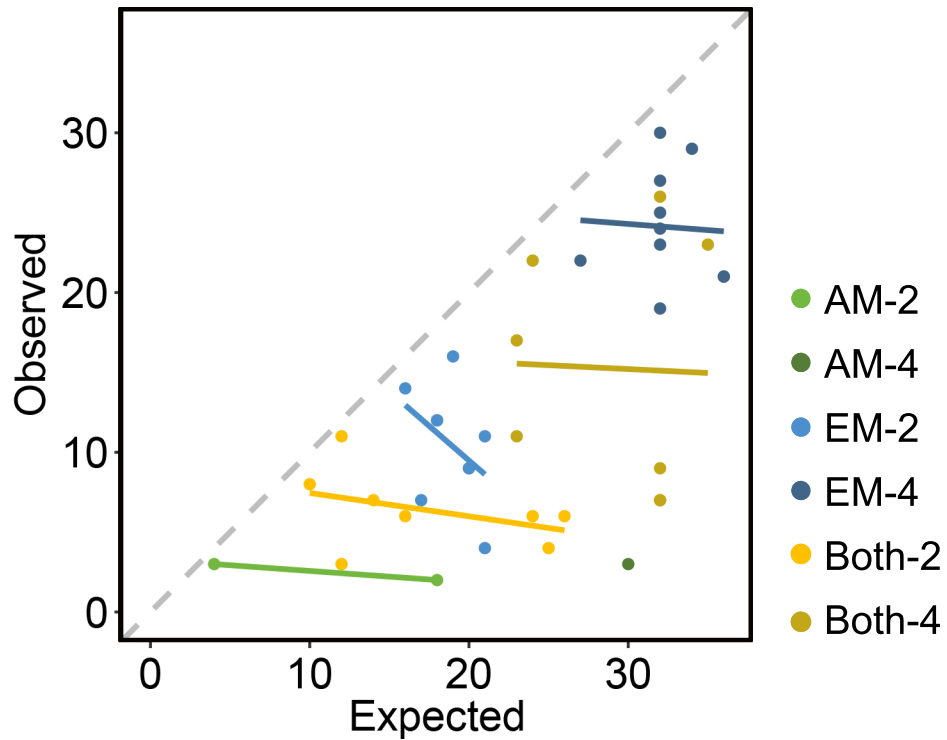

- AM-2
- AM-4
- EM-2
- EM-4
- Both-2
- Both-4

a)

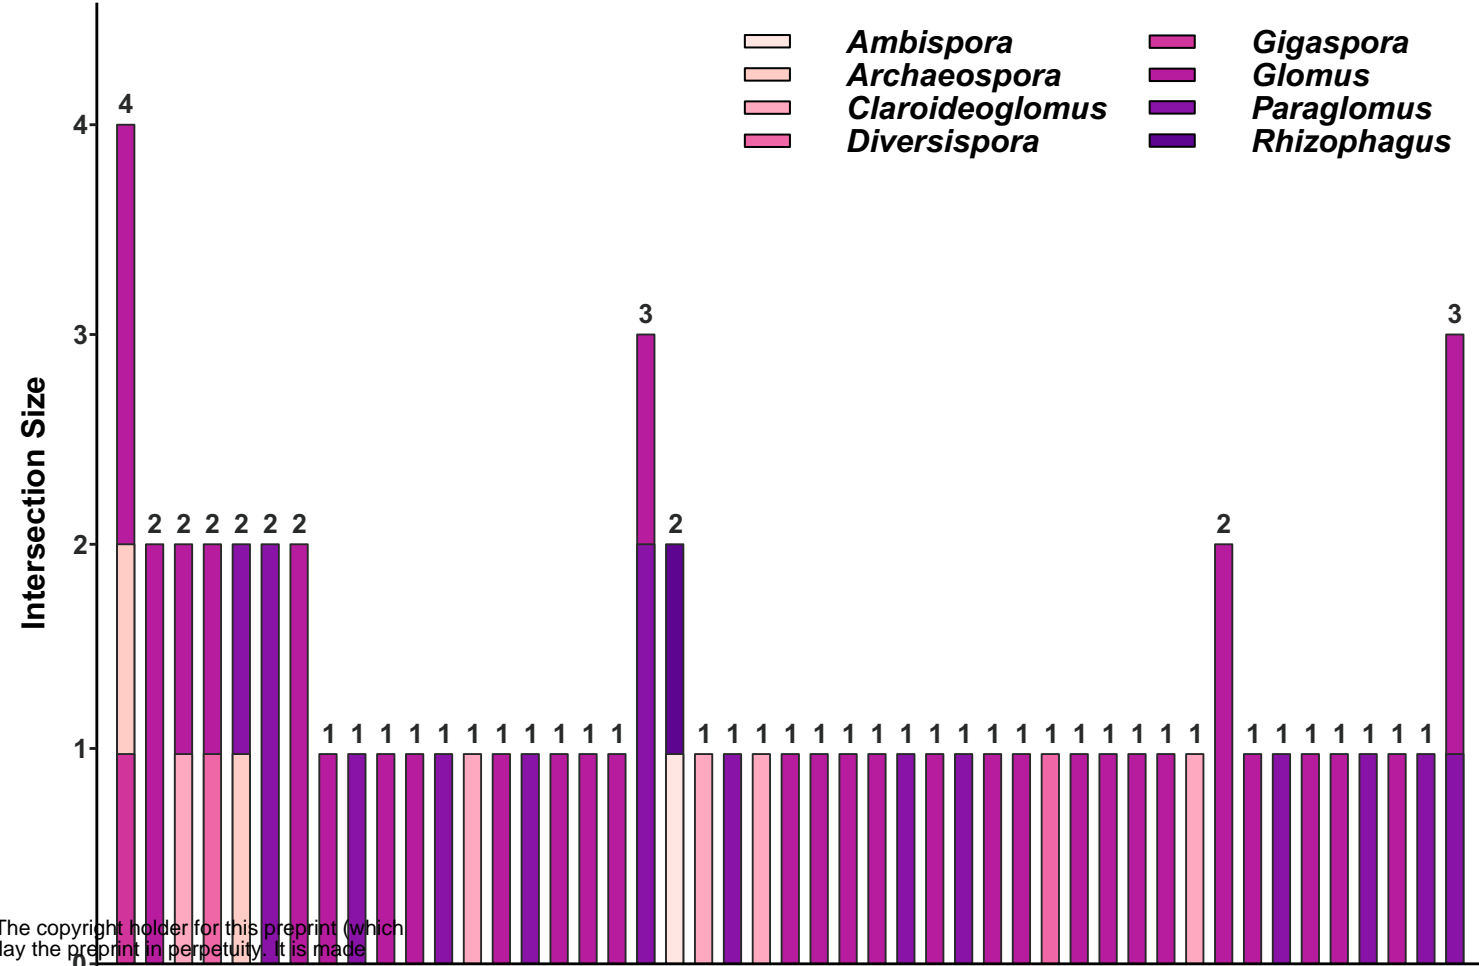

bioRxiv preprint doi: <https://doi.org/10.1101/2021.05.18.444754>; this version posted May 20, 2021. The copyright holder for this preprint (which was not certified by peer review) is the author/funder, who has granted bioRxiv a license to display the preprint in perpetuity. It is made available under aCC-BY 4.0 International license.

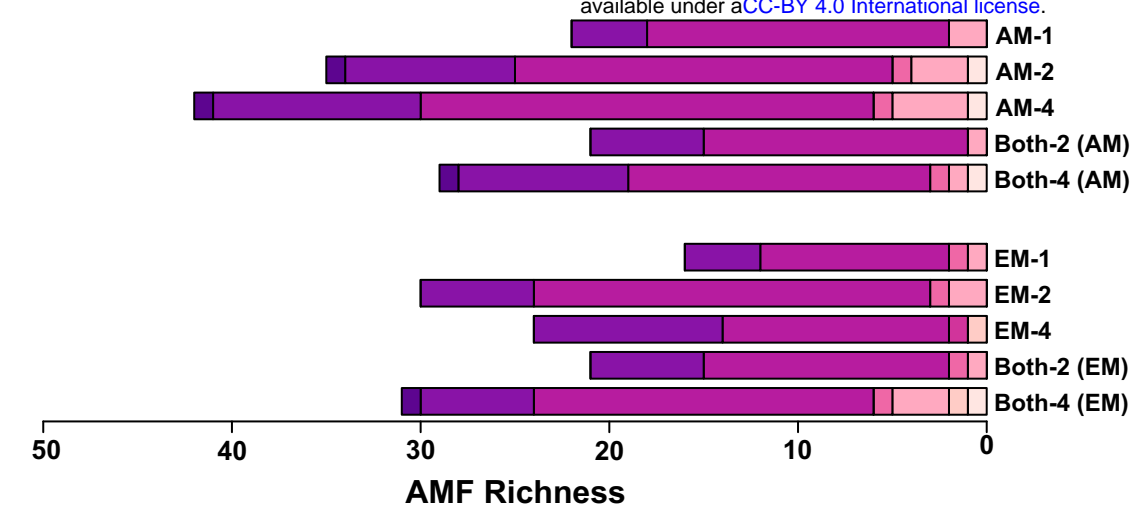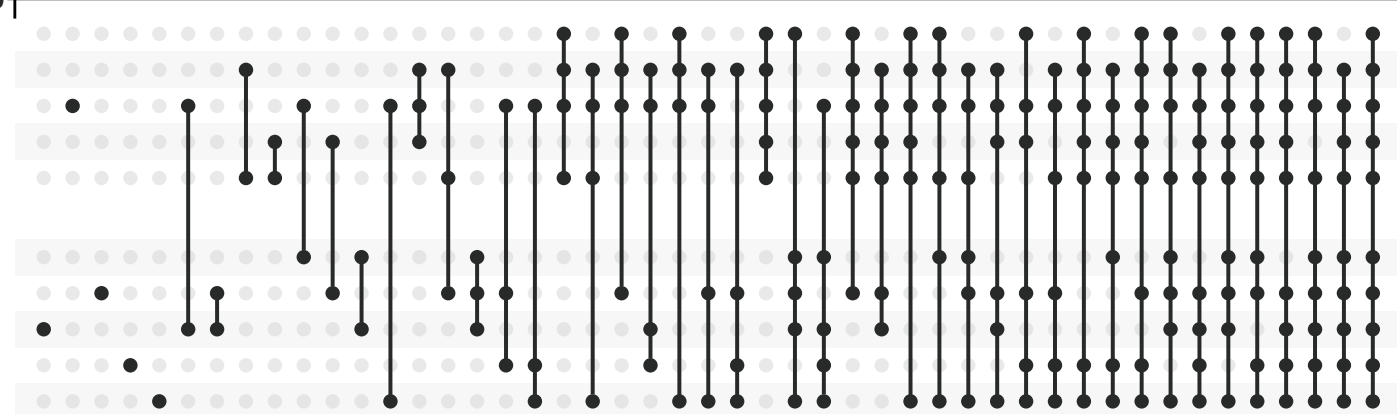

b)

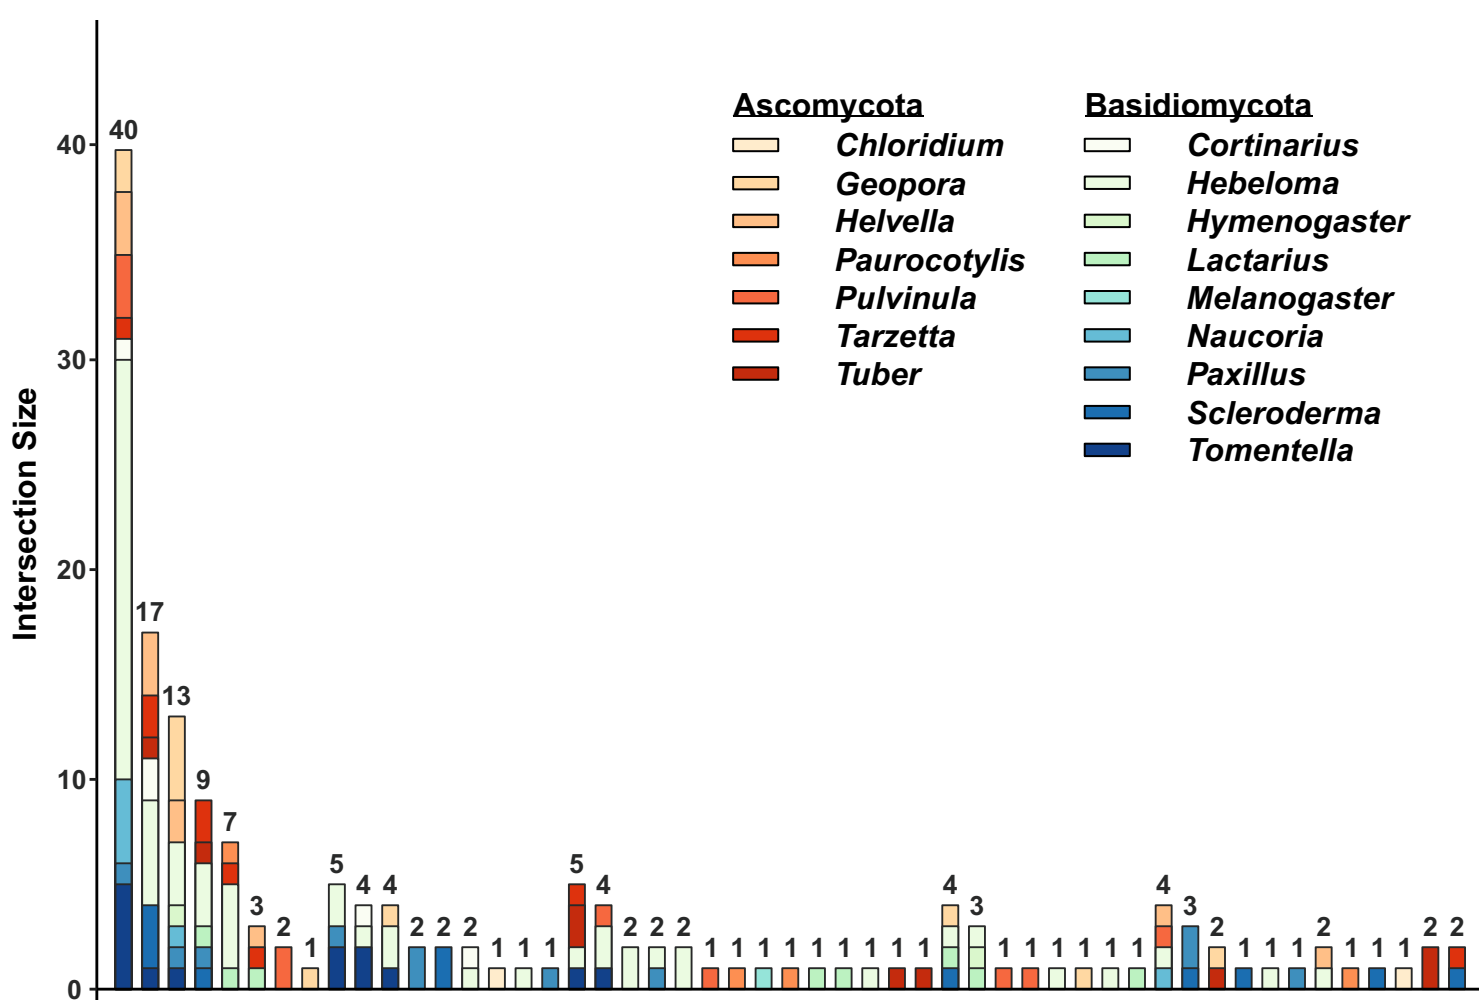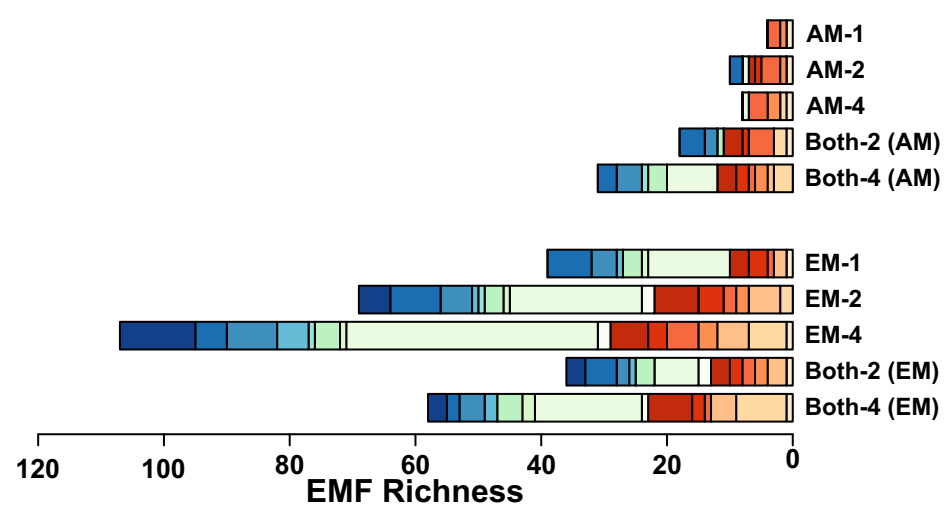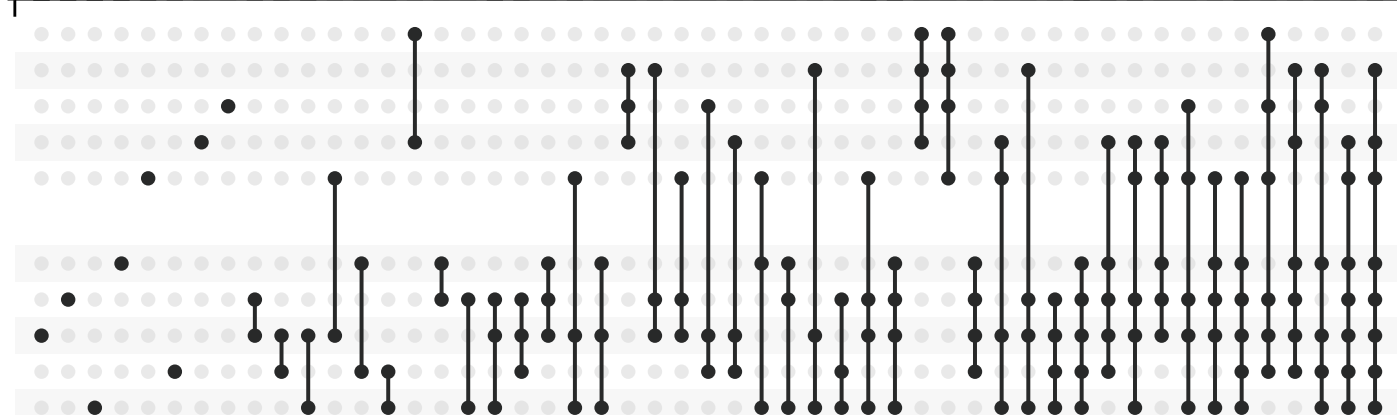

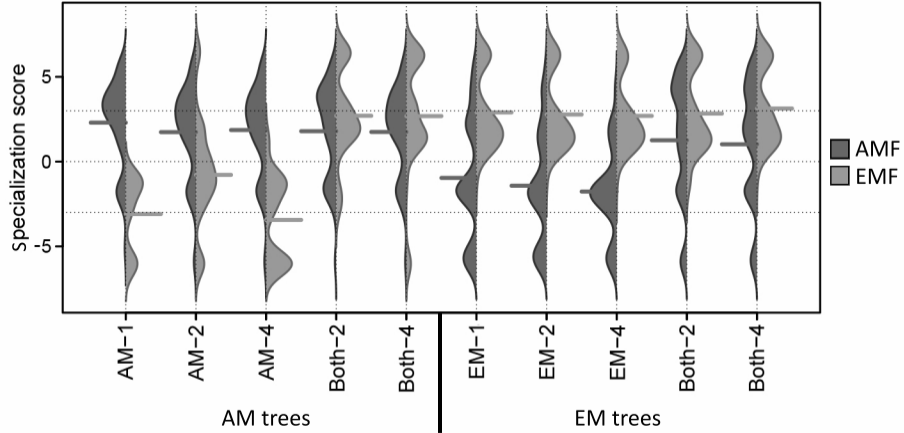

Fungal phylogenetic diversity

(a)

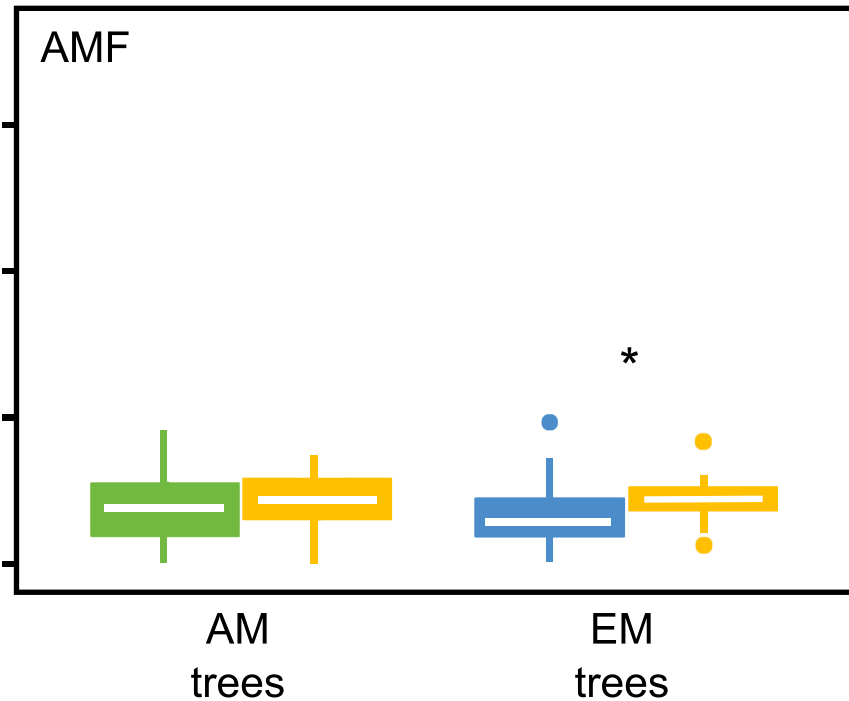

(b)

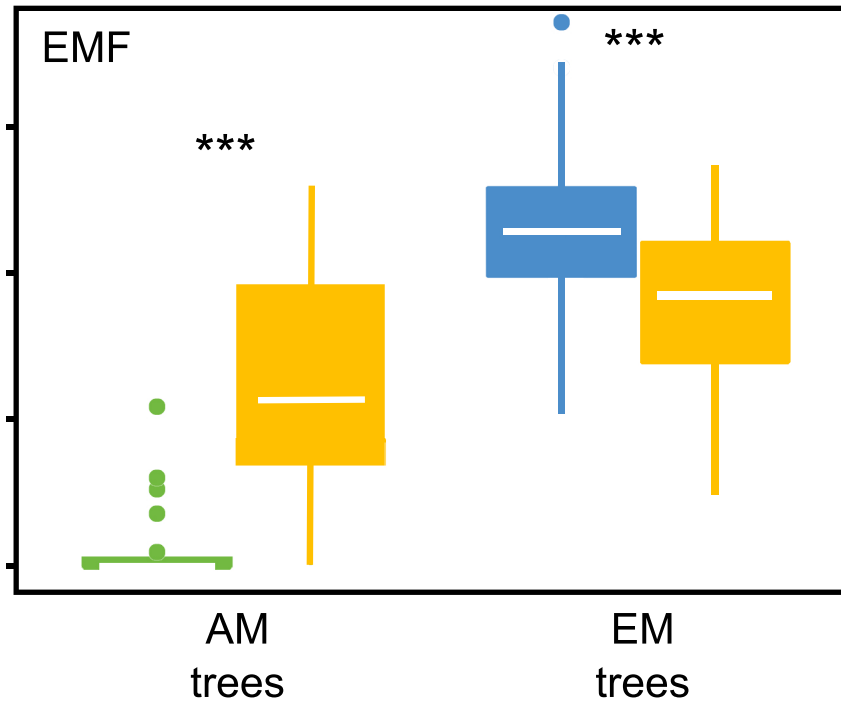

Mycorrhizal type of neighbour

- AM (same as target)
- EM (same as target)
- Different from target

**(a)**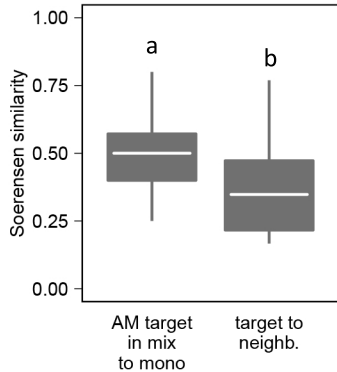**(b)**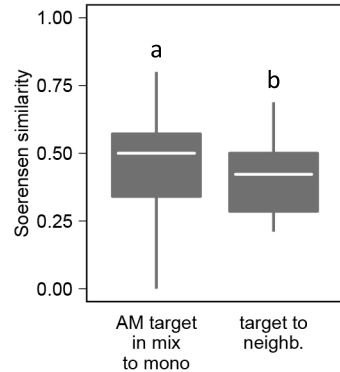**(c)**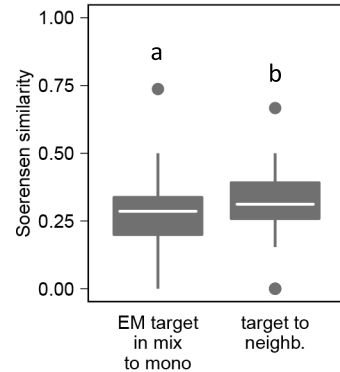**(d)**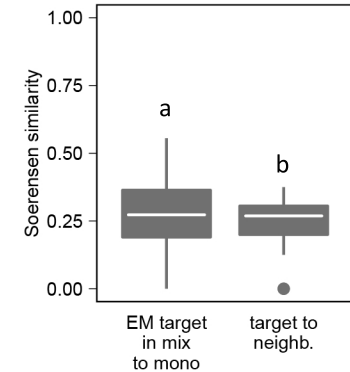

Table 1 | Summary of correlation analyses (Pearson's correlation coefficient) between expected and observed richness of arbuscular mycorrhizal fungi (AMF) and ectomycorrhizal fungi (EMF) in mixture plots, respectively. Analyses were conducted separately for the six experimental treatments (mycorrhizal type of tree: AM, EM, and Both; tree species richness levels: 2 and 4). Due to low detection rates of EMF-ASVs, two of the treatments could not be statistically tested. Significant relationships are highlighted in bold ( $P < 0.05$ ) ( $N = 188$ ).

|        | AMF richness |             |             | EMF richness |       |      |
|--------|--------------|-------------|-------------|--------------|-------|------|
|        | df           | r           | P           | df           | r     | p    |
| AM-2   | <b>6</b>     | <b>0.86</b> | <b>0.01</b> | -            | -     | -    |
| AM-4   | 7            | 0.34        | 0.37        | -            | -     | -    |
| EM-2   | 6            | 0.05        | 0.91        | 7            | -0.42 | 0.26 |
| EM-4   | 7            | -0.25       | 0.52        | 8            | -0.05 | 0.88 |
| Both-2 | <b>5</b>     | <b>0.91</b> | <b>0.00</b> | 6            | -0.39 | 0.34 |
| Both-4 | 7            | 0.63        | 0.07        | 6            | -0.03 | 0.94 |

Table 2 | Summary of linear effects analyses on phylogenetic diversity of arbuscular mycorrhizal fungi (AMF PD) and ectomycorrhizal fungi (EMF PD) as affected by tree species identity of the target tree, tree species of the neighbour tree (same vs. different), mycorrhizal type of the neighbour tree (same vs. different), and tree species richness of the plot. Analyses were conducted separately for trees predominantly associated with arbuscular mycorrhizal fungi (AM trees) and trees predominantly associated with ectomycorrhizal fungi (EM trees). Significant effects are highlighted in bold ( $P < 0.05$ ) ( $N = 188$ ).

|                            | df | AMF PD       |                   | EMF PD       |                   |
|----------------------------|----|--------------|-------------------|--------------|-------------------|
|                            |    | $X^2$        | P                 | $X^2$        | P                 |
| <b>AM trees</b>            |    |              |                   |              |                   |
| Tree species target        | 4  | <b>69.70</b> | <b>&lt; 0.001</b> | 2.55         | 0.64              |
| Tree species neighbour     | 1  | 2.63         | 0.10              | 0.29         | 0.59              |
| Mycorrhizal type neighbour | 1  | 0.08         | 0.78              | <b>36.94</b> | <b>&lt; 0.001</b> |
| Tree species richness      | 1  | 0.01         | 0.94              | 0.05         | 0.83              |
| <b>EM trees</b>            |    |              |                   |              |                   |
| Tree species target        | 4  | 5.22         | 0.27              | <b>10.84</b> | <b>0.03</b>       |
| Tree species neighbour     | 1  | 0.15         | 0.70              | 2.01         | 0.16              |
| Mycorrhizal type neighbour | 1  | <b>7.49</b>  | <b>0.01</b>       | <b>17.48</b> | <b>&lt; 0.001</b> |
| Tree species richness      | 1  | 0.10         | 0.76              | 0.13         | 0.72              |
